# Supplementary material for: Checkpoint inhibition through small molecule-induced internalization of programmed death-ligand 1
Source: PubMed Central journal article supplement (PMC7900207; doi:10.1038/s41467-021-21410-1), 2021-02-22
Supplement: 41467_2021_21410_MOESM1_ESM.pdf [file 41467_2021_21410_MOESM1_ESM.pdf]

# Supplementary Figure 1

A

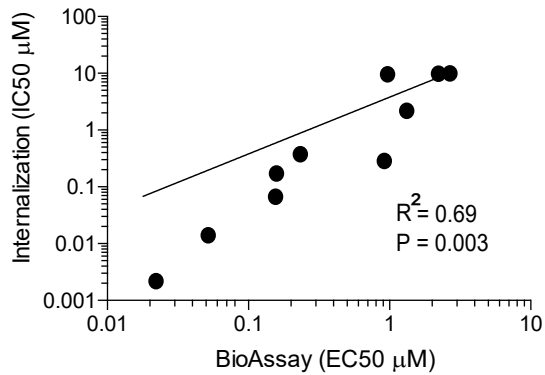

B

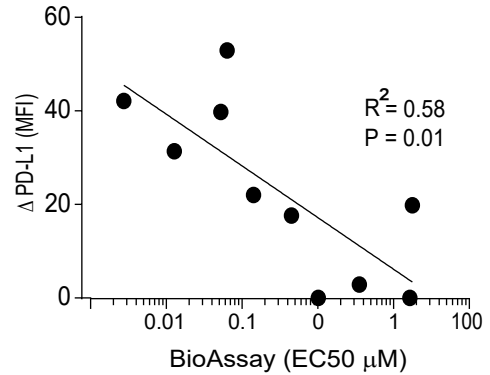

## BioAssay, HTRF, and Internalization assay correlations

(a) Correlation between IC<sub>50</sub> values by internalization assay and EC<sub>50</sub> values by bioassay of n=10 compounds. Correlation was done by Pearson's test. (b) Correlation between cell surface PD-L1 levels (MFI) and EC<sub>50</sub> values by bioassay of n=10 compounds. Correlation was done by Pearson's test. Source data are provided as a source data file.

## Supplementary Figure 2

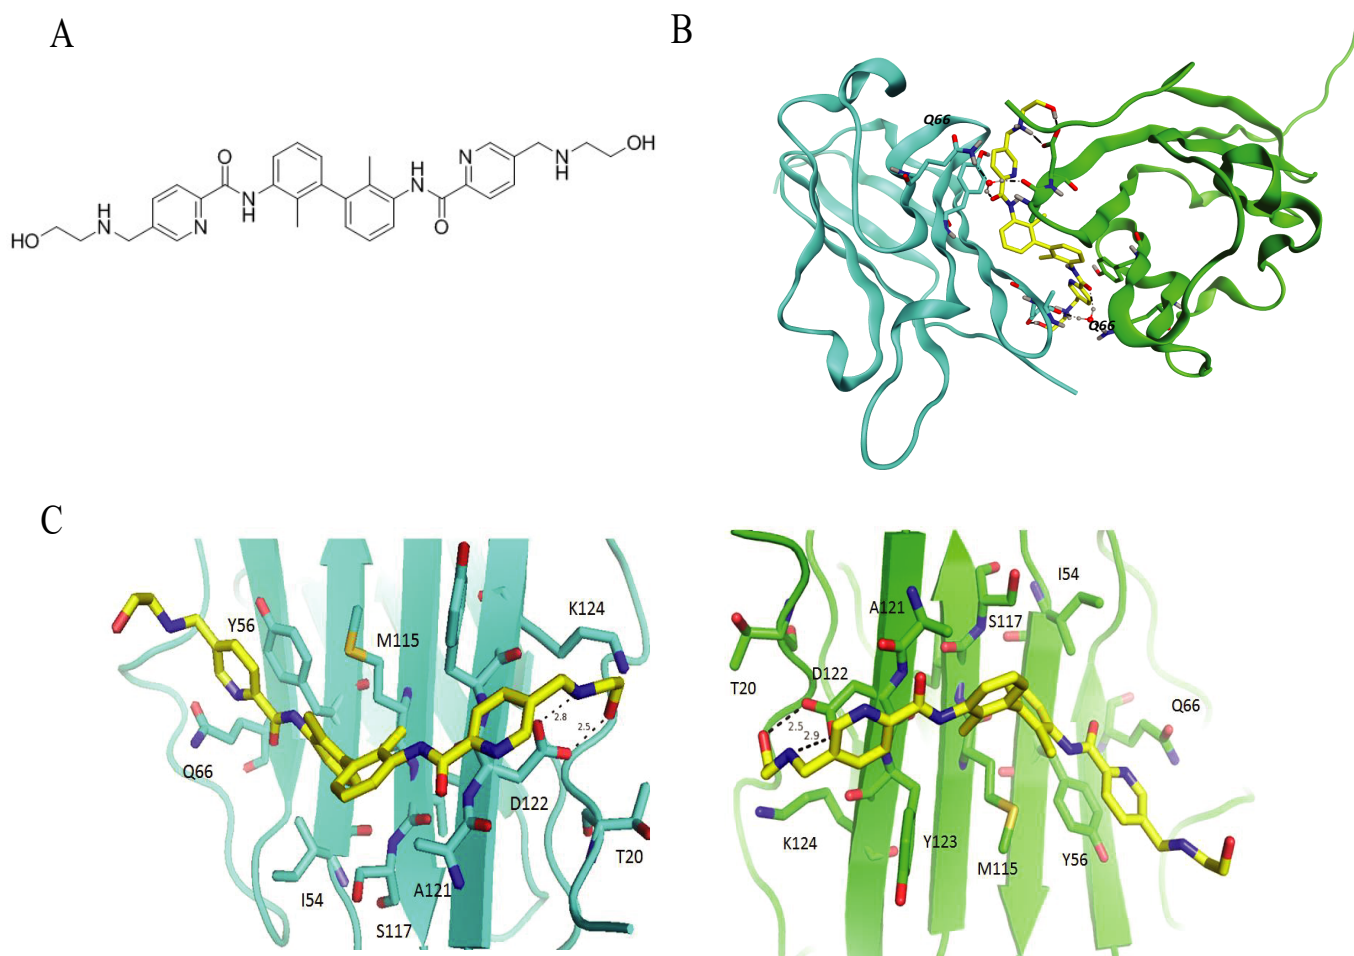

Co-crystal X-ray structure of compound A and PD-L1 protein

(a) Structure of compound A (b) Fit of compound A at dimeric PD-L1 interface. The complex structure was resolved at 2.49 Angstroms. PD-L1 in ribbon are colored cyan and green for chains A and B, respectively. Compound A is shown as a stick with carbon in magenta, oxygen in red and nitrogen in blue. (c) Interaction of compound A with Chain A (left panel) and with Chain B (right panel): Stick diagram with Chain A (carbon atoms colored green, oxygen red, nitrogen blue and sulfur yellow), and with Chain B (carbon atoms colored cyan, oxygen red, nitrogen blue and sulfure yellow). Compound A is shown as a stick figure with yellow carbon atoms, oxygen red and nitrogen blue. Source data are provided as a source data file.

## Supplementary Figure 3

A

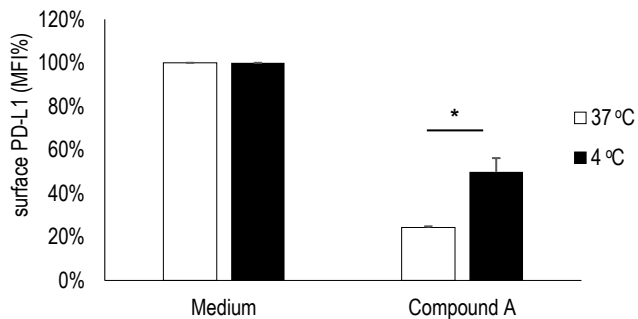

B

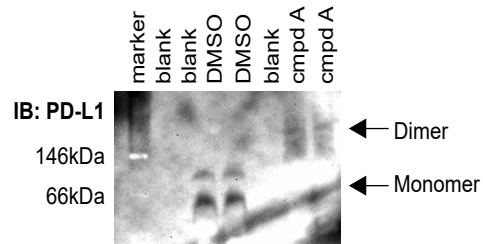

C

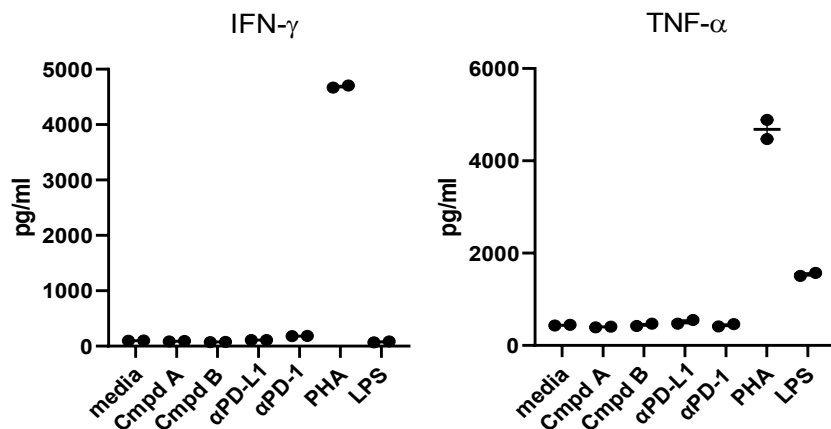

Effect of temperature on internalization

(a) Effect of compound A on surface PD-L1 internalization in 4°C and 37°C (b) Native gel electrophoresis of PD-L1 protein with and without compound A treatment to CHO-PD-L1 cells (c) Cytokine quantification in human PBMC supernatant following stimulation with compound A, compound B,  $\alpha$ PD-1,  $\alpha$ PD-L1, and positive controls PHA and LPS. IFN- $\gamma$  and TNF- $\alpha$  cytokine expression from PBMCs are represented. Source data are provided as a source data file.

## Supplementary Figure 4

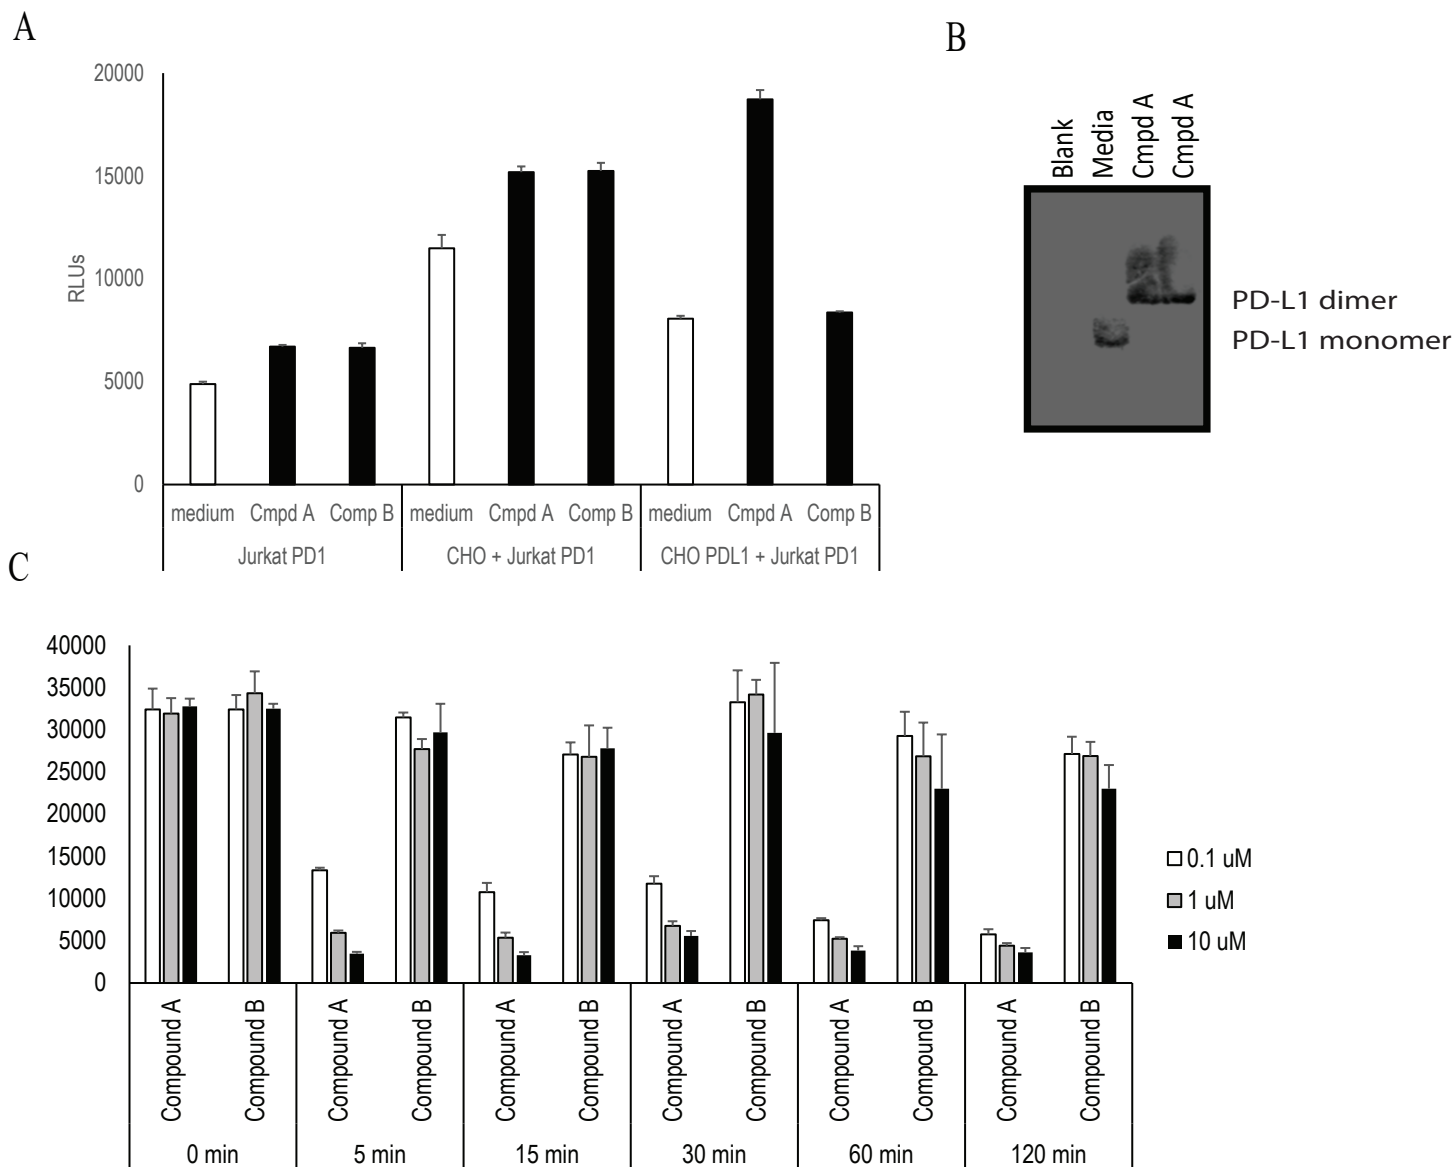

### Dose response of small molecule-induced PD-L1 internalization

(a) Cell surface PD-L1 expression (RLUs) in Jurkat PD-1, CHO knockout PD-L1 + Jurkat PD-1 co-culture, and CHO PD-L1 + Jurkat PD-1 co-cultures following treatment with compound A or compound B (b) Immunoblot of recombinant PD-L1 protein with and without compound A treatment. Monomeric and dimeric PD-L1 protein are notated (c) Kinetics of compound A-induced PD-L1 cell surface internalization. Source data are provided as a source data file.

## Supplementary Figure 5

A

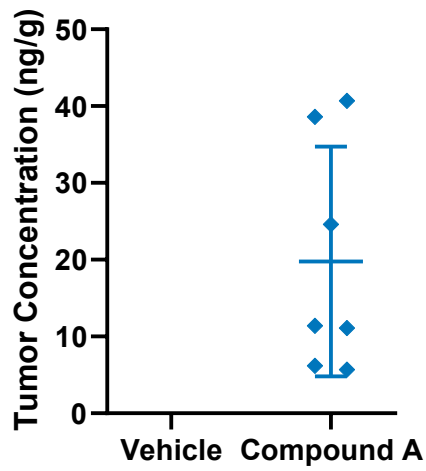

B

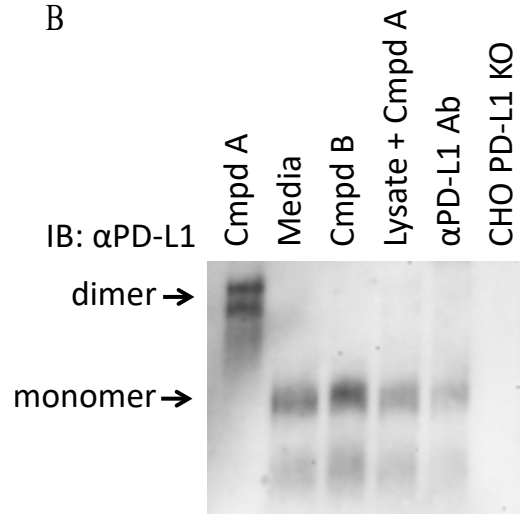

Compound A tumor concentrations

(a) Tumor compound A concentrations (ng/g) on day 28 (study termination) (b) Native PD-L1 immunoblot in cells devoid of PD-L1 (CHO PD-L1 KO) with and without compound A treatment. Dimer and monomer are indicated with an arrow. Source data are provided as a source data file.

Supplementary Table 1 Data Collection and Refinement Statistics

|                                                                     |                                                                       |
|---------------------------------------------------------------------|-----------------------------------------------------------------------|
|                                                                     | PD-L1/Compound A Complex                                              |
| <b>Data Collection</b>                                              |                                                                       |
| Space Group                                                         | $C222_1$                                                              |
| Cell Dimensions<br>a, b, c (Å)<br>$\alpha$ , $\beta$ , $\gamma$ (°) | 99.003, 172.173, 80.585<br>90, 90, 90                                 |
| Resolution (Å)                                                      | 80.59 – 2.49 (2.62 – 2.49)*                                           |
| $R_{\text{merge}}$                                                  | 9.7 (116)*                                                            |
| $I/\sigma I$                                                        | 14.6 (2.0)*                                                           |
| Completeness (%)                                                    | 99.1 (99.1)*                                                          |
| Redundancy                                                          | 7.3 (7.7)*                                                            |
| <b>Refinement</b>                                                   |                                                                       |
| Resolution (Å)                                                      | 2.49                                                                  |
| No. reflections                                                     | 23,114                                                                |
| $R_{\text{work}}/R_{\text{free}}$                                   | 0.177/0.228                                                           |
| No. atoms<br>Protein<br>Ligand<br>Waters                            | 2,912<br>63<br>139                                                    |
| Average $B$ -factors                                                | A, B, C                                                               |
| main chain atoms<br>side chain atoms<br>Ligand<br>Water             | 53.0, 54.2, 55.6<br>61.4, 63.2, 66.3<br>47.2(A:B), 45.6(C:C')<br>56.3 |
| R.M.S.D. <sup>§</sup><br>Bond Lengths (Å)<br>Bond Angles (°)        | <br>0.012<br>1.66                                                     |

\*Values in parentheses represent the highest resolution shell.

§Root-mean square deviation from target geometry.
